# Supplementary material
Source: PubMed Central journal article supplement (PMC4329119)
Supplement: NIHMS608261-supplement-Supplementary_Figure_S2.pdf [file NIHMS608261-supplement-Supplementary_Figure_S2.pdf]

**A.**

|                      |   |   |   |   |
|----------------------|---|---|---|---|
| <i>PDCD10</i> siRNA: | + | + | - | - |
| Control siRNA:       | - | - | + | + |
| H-1152:              | - | + | - | + |

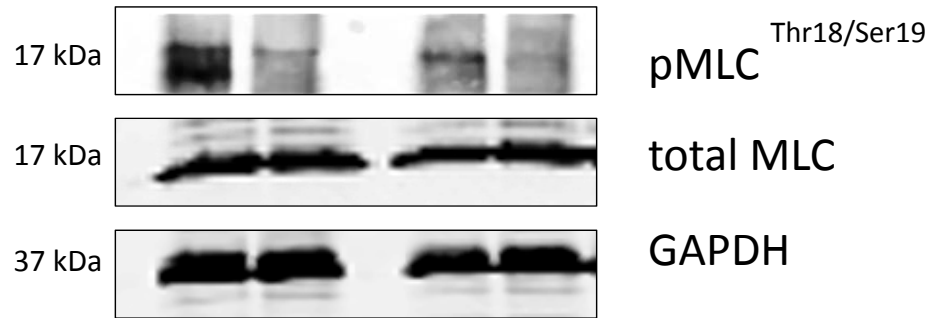

**B.**

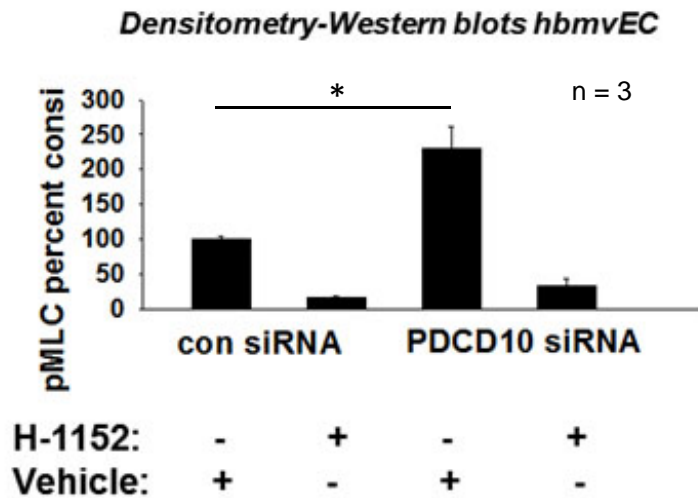

**Figure S2. Increased ROCK activity by PDCD10 depletion is reversed by H-1152.** (A) A representative Western blot showing that increased pMLC levels in human brain microvascular cells (hbmvEC) by *PDCD10* siRNA were suppressed by the ROCK inhibitor H-1152. Levels of total MLC and glyceraldehyde 3-phosphate dehydrogenase (GAPDH) were not affected by *PDCD10* siRNA. (B) Increased ROCK activity by PDCD10 depletion was confirmed by densitometry of three Western blots. Absorption levels of pMLC were averaged from three replicates in each treatment group. Levels of pMLC are given as a percentage of the levels in hbmvEC cells that were only treated with control (con) siRNA.
