# Supplementary material
Source: PubMed Central journal article supplement (PMC4329119)

**Figure S3. The effect of knockdown of CCM genes on their expression and on GTP-RhoA activity in human brain microvascular endothelial cells.** (A) *KRIT1*, (B) *CCM2* or (C) *PDCD10* expression was reduced (left panels) and GTP-RhoA activity was increased (right panels) by (*KRIT1* si), *CCM2* (*CCM2* si) or *PDCD10* (*PDCD10* si) siRNA treatment, respectively, as compared to control siRNA treatment (consi). The addition of vectors containing cDNA encoding wild type human *KRIT1* (+wt*KRIT1*), *CCM2* (+wt*CCM2*) or *PDCD10* (+wt*PDCD10*), respectively, reversed the altered expression and GTP-RhoA activity resulting from CCM gene knockdown by siRNA treatment.

A.

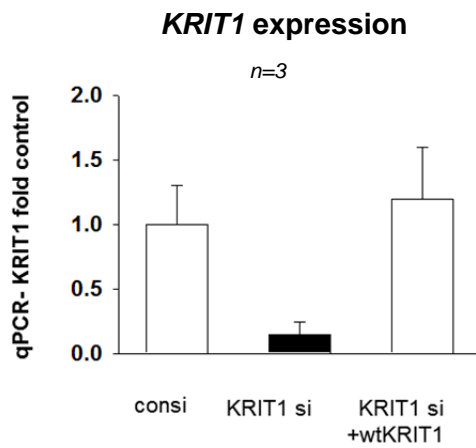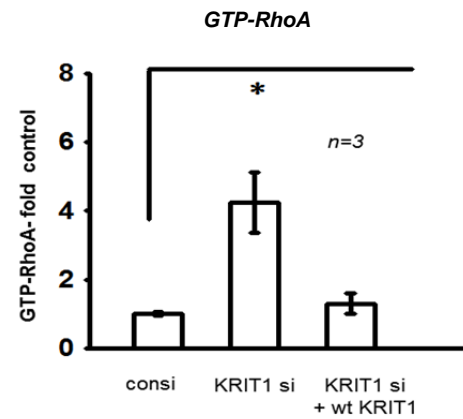

B.

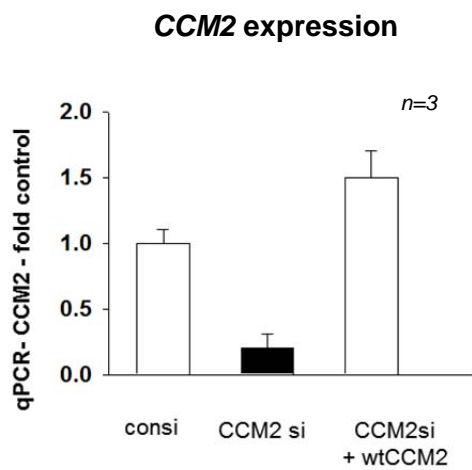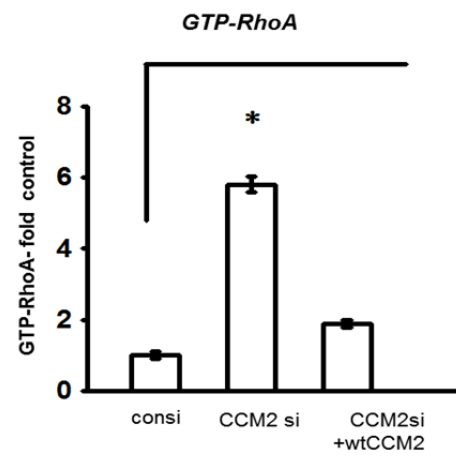

C.

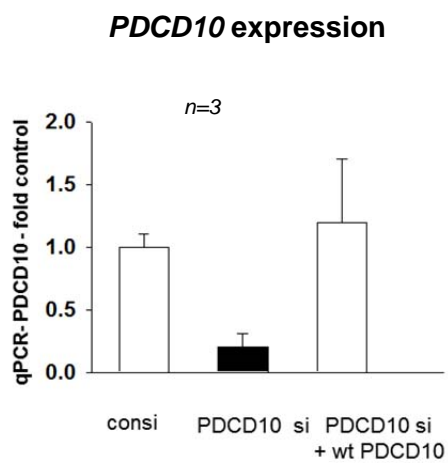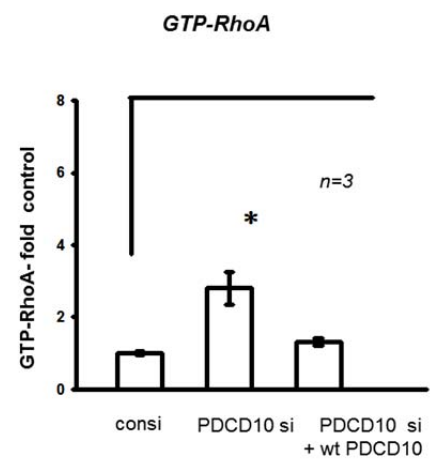

Supplement: NIHMS608261-supplement-Supplementary_Figure_S3.pdf [file NIHMS608261-supplement-Supplementary_Figure_S3.pdf]
