# Supplementary material
Source: PubMed Central journal article supplement (PMC4329119)
Supplement: NIHMS608261-supplement-Supplementary_Figure_S4.pdf [file NIHMS608261-supplement-Supplementary_Figure_S4.pdf]

**Figure S4. ROCK activity in *Pdcd10* murine models.** ROCK activity in both sensitized and non-sensitized *Pdcd10*<sup>+/-</sup> mouse brains, shown by brown pMLC (left) and pMBS (right) staining. Bars are 100 μm for multicavernous Stage 2 CCM lesions and 50 μm for background capillaries.

Stage 2 CCM lesions (20X)

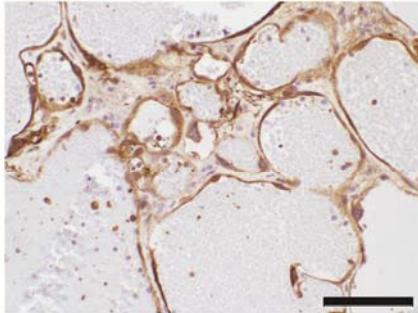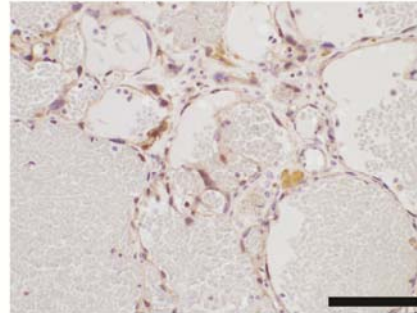

*Pdc10+/-Trp53-/-*

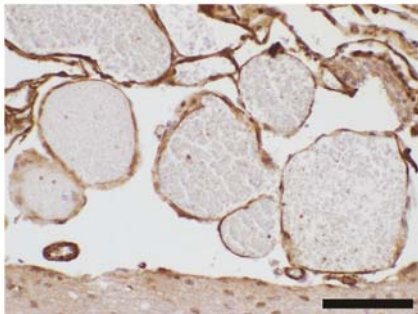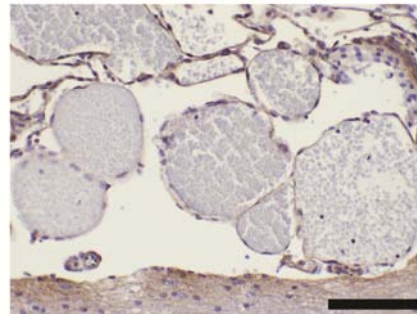

*Pdc10+/-Trp53+/+*

Background capillaries (40X)

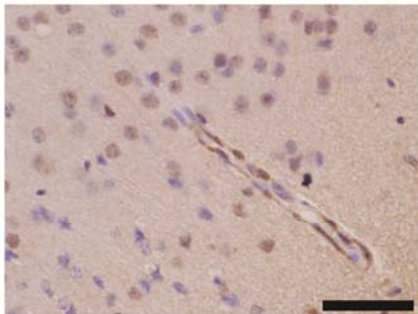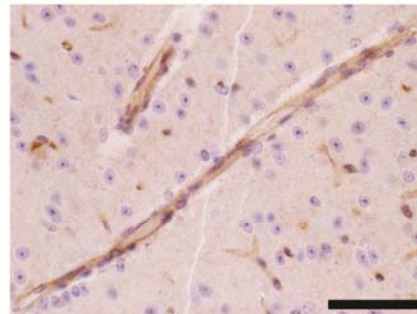

*Pdc10+/-Trp53-/-*

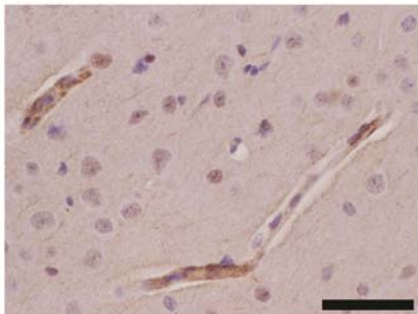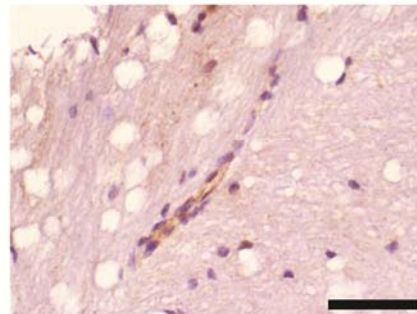

*Pdc10+/-Trp53+/+*

pMLC

pMBS
