# Supplementary material
Source: PubMed Central journal article supplement (PMC4329119)
Supplement: NIHMS608261-supplement-Supplementary_Figure_S5.pdf [file NIHMS608261-supplement-Supplementary_Figure_S5.pdf]

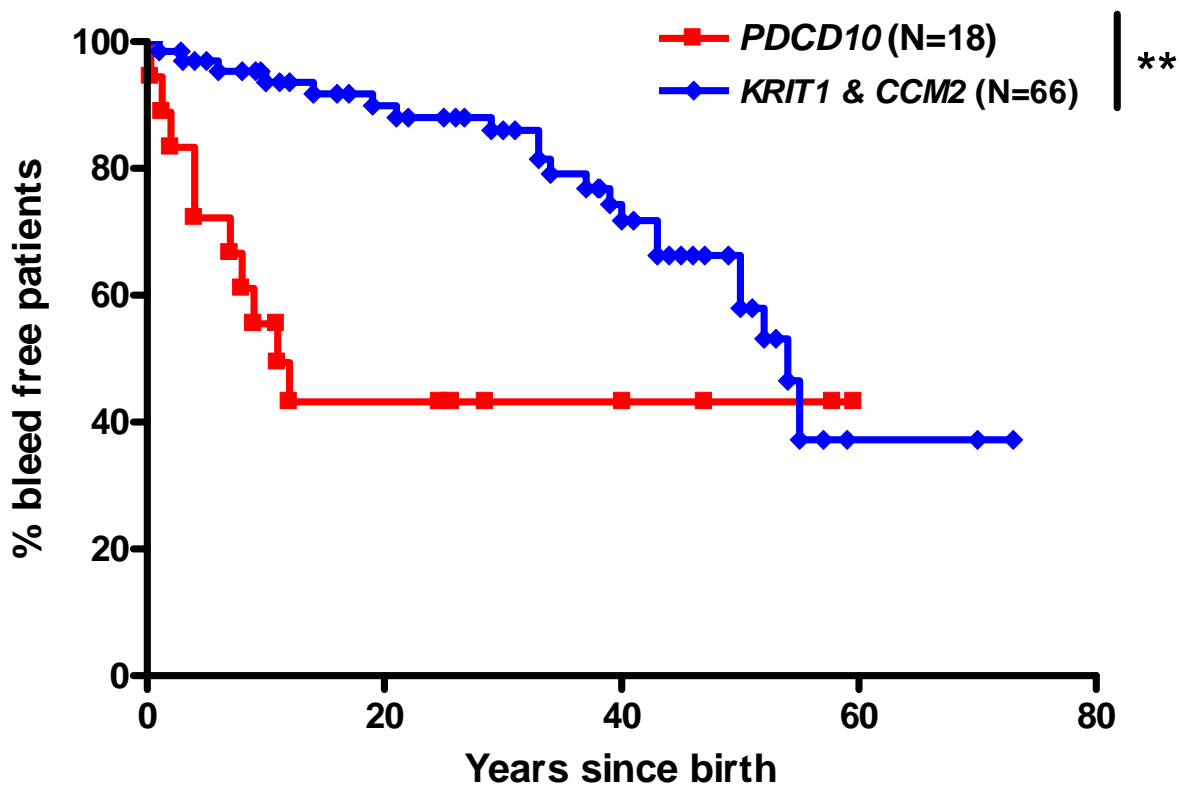

Figure S5. The age at first bleed is lower in *PDCD10* subjects than in non-*PDCD10* subjects. The distribution of age at first bleed was compared using the log rank test.
