# Supplementary material
Source: PubMed Central journal article supplement (PMC4329119)
Supplement: NIHMS608261-supplement-Supplementary_Figure_S6.pdf [file NIHMS608261-supplement-Supplementary_Figure_S6.pdf]

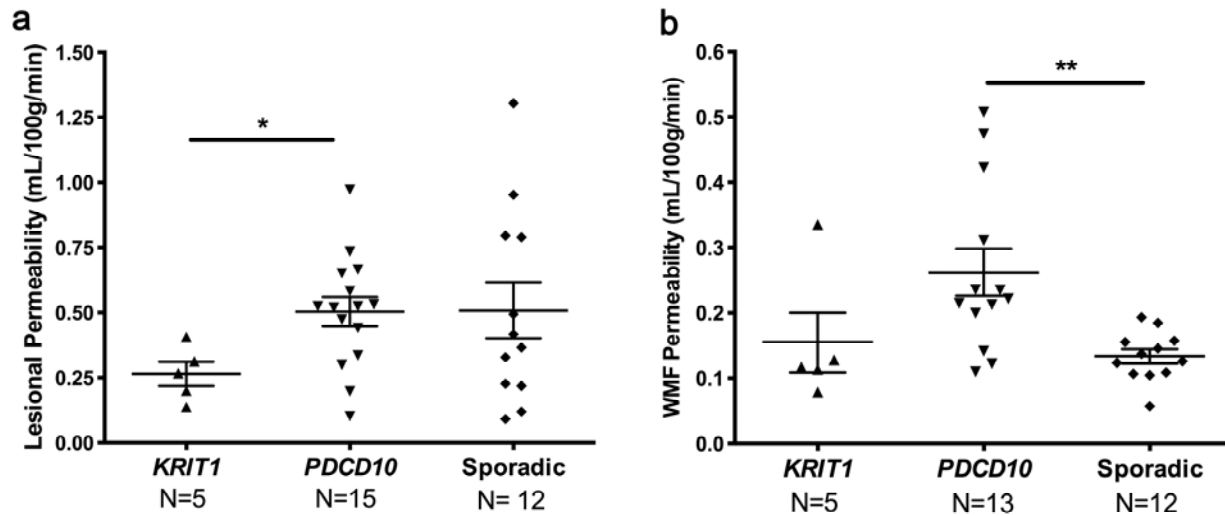

**Figure S6. Permeability in *PDCD10* subjects.** Each data point represents an average per patient of all permeability measurements in either lesions or white matter. (A) Permeability of CCM lesions was significantly higher in *PDCD10* patients than in *KRIT1* familial patients (\* $P < 0.05$ ). (B) Brain permeability in white matter far (WMF) from lesions was significantly higher in the *PDCD10* (*CCM3*) patients compared to patients with sporadic lesions, without germ line CCM mutations (\* $P < 0.05$ ) (two *PDCD10* patients did not have WMF permeability values due to high lesion numbers). Data bars are means  $\pm$  SE.
