# Supplementary material
Source: PubMed Central journal article supplement (PMC4329119)
Supplement: NIHMS608261-supplement-Supplementary_Information.pdf [file NIHMS608261-supplement-Supplementary_Information.pdf]

# EXCEPTIONAL AGGRESSIVENESS OF CEREBRAL CAVERNOUS MALFORMATION DISEASE ASSOCIATED WITH *PDCD10* MUTATIONS

Shenkar et al.

## SUPPLEMENTARY INFORMATION

SUPPLEMENTARY MATERIALS AND METHODS [Acrobat file (pdf)]

Figure S1. The effect of knockdown of CCM genes and ROCK inhibitor H1152 in human brain microvascular endothelial cells. [Acrobat file (pdf)]

Figure S2. Increased ROCK activity by *PDCD10* depletion is reversed by H-1152. [Acrobat file (pdf)]

Figure S3. The effect of knockdown of CCM genes on their expression and on GTP-RhoA activity in human brain microvascular endothelial cells. [Acrobat file (pdf)]

Figure S4. ROCK activity in *Pdcd10* murine models. [Acrobat file (pdf)]

Figure S5. The age at first bleed is lower in *PDCD10* subjects than in non-*PDCD10* subjects. [Acrobat file (pdf)]

Figure S6. Permeability in *PDCD10* subjects. [Acrobat file (pdf)]

Table S1. Comparative penetrance (lesion burden) in heterozygous CCM murine models (at age 4-5 months). [Acrobat file (pdf)]
