# Supplementary material
Source: PubMed Central journal article supplement (PMC4329119)
Supplement: NIHMS608261-supplement-Supplementary_Table_S1.pdf [file NIHMS608261-supplement-Supplementary_Table_S1.pdf]

**Table S1.** Comparative penetrance (lesion burden) in heterozygous CCM murine models (at age 4-5 months).

|                                                                              | Stage 1 lesions/mouse | Stage 2 lesions/mouse | Total |
|------------------------------------------------------------------------------|-----------------------|-----------------------|-------|
| <b>Non-sensitized Heterozygotes</b>                                          |                       |                       |       |
| <i>Krit1</i> <sup>+/-</sup> (n = 16) <sup>a,b</sup>                          | 0                     | 0                     | 0     |
| <i>Ccm2</i> <sup>+/-</sup> (n = 9) <sup>a,b</sup>                            | 0                     | 0                     | 0     |
| <i>Pdcd10</i> <sup>+/-</sup> (n = 15)                                        | 1.1                   | 0.5                   | 1.6   |
| <b>Sensitized Heterozygotes</b>                                              |                       |                       |       |
| <i>Krit1</i> <sup>+/-</sup> <i>Msh2</i> <sup>-/-</sup> (n = 16) <sup>c</sup> | 0.4                   | 1.0                   | 1.4   |
| <i>Krit1</i> <sup>+/-</sup> <i>Trp53</i> <sup>-/-</sup> (n=8) <sup>a</sup>   | Not determined        | Not determined        | 9.4   |
| <i>Ccm2</i> <sup>+/-</sup> <i>Msh2</i> <sup>-/-</sup> (n = 11) <sup>b</sup>  | 0                     | 0                     | 0     |
| <i>Ccm2</i> <sup>+/-</sup> <i>Trp53</i> <sup>-/-</sup> (n = 18) <sup>c</sup> | 0.7                   | 0.6                   | 1.2   |
| <i>Pdcd10</i> <sup>+/-</sup> <i>Trp53</i> <sup>-/-</sup> (n = 15)            | 2.2                   | 14.1                  | 16.3  |

<sup>a</sup>Shenkar et al. (2008)<sup>6</sup>.

<sup>b</sup>McDonald et al. (2011)<sup>2</sup>.

<sup>c</sup>unpublished data.
